# Supplementary material for: Composite toxicity assays for enhanced assessment of decentralized potable reuse systems
Source: Royal Society of Chemistry journal article supplement (doi:10.1039/d0ew00437e), 2020-01-01
Supplement: d0ew00437e1.pdf [file d0ew00437e1.pdf]

Supplemental Information

**Table S1.a** Parameter values for water samples analyzed in the Gray Water Reuse and Building DPR tests. ND = Not Detected. LoD = Limit of Detection. Blue shading designates advanced treatment.

| Parameter  | Units | LoD   | Gray Water Reuse |       | Building DPR |      |      |
|------------|-------|-------|------------------|-------|--------------|------|------|
|            |       |       | GW               | GWTRS | WWE          | DPR  | Tap  |
| Aluminum   | mg/L  | 0.05  | ND               | ND    | ND           | ND   | ND   |
| Antimony   | mg/L  | 0.006 | ND               | ND    | ND           | ND   | ND   |
| Arsenic    | mg/L  | 0.002 | ND               | ND    | ND           | ND   | ND   |
| Barium     | mg/L  | 0.05  | ND               | ND    | ND           | ND   | ND   |
| Beryllium  | mg/L  | 0.002 | ND               | ND    | ND           | ND   | ND   |
| Boron      | mg/L  | 0.01  | ND               | ND    | 0.06         | ND   | ND   |
| Cadmium    | mg/L  | 0.001 | ND               | ND    | ND           | ND   | ND   |
| Calcium    | mg/L  | 0.1   | 33               | ND    | 9.8          | 0.5  | 0.3  |
| Cesium     | mg/L  | 0.02  | ND               | ND    | ND           | ND   | ND   |
| Chromium   | mg/L  | 0.01  | ND               | ND    | ND           | ND   | ND   |
| Copper     | mg/L  | 0.02  | 0.32             | ND    | ND           | ND   | ND   |
| Iron       | mg/L  | 0.01  | 0.05             | ND    | 0.1          | ND   | 0.03 |
| Lead       | mg/L  | 0.001 | 0.01             | ND    | ND           | ND   | ND   |
| Magnesium  | mg/L  | 0.1   | 20               | ND    | 3.9          | 5.1  | ND   |
| Manganese  | mg/L  | 0.005 | ND               | ND    | 0.016        | ND   | ND   |
| Mercury    | ug/L  | 0.025 | ND               | ND    | ND           | ND   | ND   |
| Molybdenum | mg/L  | 0.02  | ND               | ND    | ND           | ND   | ND   |
| Nickel     | mg/L  | 0.02  | ND               | ND    | ND           | ND   | ND   |
| Potassium  | mg/L  | 0.1   | 3                | ND    | 24.1         | 0.6  | 2    |
| Selenium   | mg/L  | 0.005 | ND               | ND    | ND           | ND   | ND   |
| Silver     | mg/L  | 0.005 | ND               | ND    | ND           | ND   | ND   |
| Sodium     | mg/L  | 0.1   | 31               | ND    | 149          | 4    | 204  |
| Strontium  | mg/L  | 0.001 | 0.04             | ND    | ND           | ND   | ND   |
| Sulfur     | mg/L  | 0.2   | ND               | ND    | 24.4         | ND   | 38.6 |
| Thallium   | mg/L  | 0.002 | ND               | ND    | ND           | ND   | ND   |
| Uranium    | mg/L  | 0.005 | ND               | ND    | ND           | ND   | ND   |
| Zinc       | mg/L  | 0.02  | 0.04             | ND    | ND           | ND   | ND   |
| Alkalinity | mg/L  | 10    | 232              | ND    | 208          | 28   | 244  |
| Bromide    | mg/L  | 0.1   | ND               | ND    | 0.13         | ND   | 0.2  |
| Chlorate   | mg/L  | 0.05  | ND               | ND    | ND           | ND   | ND   |
| Chloride   | mg/L  | 0.2   | 22               | ND    | 61.5         | 1.6  | 75   |
| Fluoride   | mg/L  | 0.05  | 0.7              | ND    | ND           | ND   | 0.11 |
| Hardness   | mg/L  | 10    | 149              | ND    | 41           | 22.3 | ND   |
| Nitrate    | mg/L  | 0.1   | 2                | ND    | 10.5         | 0.8  | ND   |
| Nitrite    | mg/L  | 0.1   | ND               | ND    | ND           | ND   | ND   |
| pH         | s.u.  | -     | 7.7              | 6.5   | 7.6          | 7.6  | 7.3  |

**Table S1.b** Parameter values for water samples analyzed in the Gray Water Reuse and Building DPR tests (continued). ND = Not Detected. LoD = Limit of Detection. Blue shading designates advanced treatment.

| Parameter                   | Units | LoD  | Gray Water Reuse |       | Building DPR |     |      |
|-----------------------------|-------|------|------------------|-------|--------------|-----|------|
|                             |       |      | GW               | GWTRS | WWE          | DPR | Tap  |
| Silica                      | mg/L  | 0.1  | ND               | ND    | 7.1          | ND  | 11.6 |
| Sulfate                     | mg/L  | 0.5  | ND               | ND    | 71           | ND  | 109  |
| Total Dissolved Solids      | mg/L  | 10   | 356              | ND    | 570          | 42  | 640  |
| Total Organic Carbon        | mg/L  | 0.05 | 34               | 2.1   | 14.2         | 2.1 | 6    |
| 1,1,1-Trichloroethane       | µg/L  | 0.5  | ND               | ND    | ND           | ND  | ND   |
| 1,1,2,2-Tetrachloroethane   | µg/L  | 0.5  | ND               | ND    | ND           | ND  | ND   |
| 1,1,2-Trichloroethane       | µg/L  | 0.5  | ND               | ND    | ND           | ND  | ND   |
| 1,1-Dichloroethane          | µg/L  | 0.5  | ND               | ND    | ND           | ND  | ND   |
| 1,1-Dichloroethene          | µg/L  | 0.5  | ND               | ND    | ND           | ND  | ND   |
| 1,2,3-Trichloropropane      | µg/L  | 0.5  | ND               | ND    | ND           | ND  | ND   |
| 1,2,4-Trichlorobenzene      | µg/L  | 0.5  | ND               | ND    | ND           | ND  | ND   |
| 1,2-Dibromo-3-chloropropane | µg/L  | 0.2  | ND               | ND    | ND           | ND  | ND   |
| 1,2-Dichlorobenzene         | µg/L  | 0.5  | ND               | ND    | ND           | ND  | ND   |
| 1,2-Dichloroethane          | µg/L  | 0.5  | ND               | ND    | ND           | ND  | ND   |
| 1,2-Dichloropropane         | µg/L  | 0.5  | ND               | ND    | ND           | ND  | ND   |
| 1,3-Dichlorobenzene         | µg/L  | 0.5  | ND               | ND    | ND           | ND  | ND   |
| 1,3-Dichloropropane         | µg/L  | 0.5  | ND               | ND    | ND           | ND  | ND   |
| 1,4-Dichlorobenzene         | µg/L  | 0.5  | ND               | ND    | ND           | ND  | ND   |
| Acrolein                    | µg/L  | 20   | ND               | ND    | ND           | ND  | ND   |
| Acrylonitrile               | µg/L  | 2    | ND               | ND    | ND           | ND  | ND   |
| Benzene                     | µg/L  | 0.5  | ND               | ND    | ND           | ND  | ND   |
| Bromodichloromethane        | µg/L  | 1    | ND               | ND    | ND           | ND  | ND   |
| Bromoform                   | µg/L  | 1    | ND               | ND    | ND           | ND  | ND   |
| Carbon tetrachloride        | µg/L  | 0.5  | ND               | ND    | ND           | ND  | ND   |
| Chloroform                  | µg/L  | 0.5  | ND               | ND    | ND           | ND  | ND   |
| Chlorobenzene               | µg/L  | 0.5  | ND               | ND    | ND           | ND  | ND   |
| Cis-1,2-Dichloroethene      | µg/L  | 0.5  | ND               | ND    | ND           | ND  | ND   |
| Cis-1,3-Dichloropropene     | µg/L  | 0.5  | ND               | ND    | ND           | ND  | ND   |
| Dibromochloromethane        | µg/L  | 1    | ND               | ND    | ND           | ND  | ND   |
| Ethylbenzene                | µg/L  | 0.5  | ND               | ND    | ND           | ND  | ND   |
| Ethylene dibromide          | µg/L  | 0.2  | ND               | ND    | ND           | ND  | ND   |
| Hexachlorobutadiene         | µg/L  | 0.2  | ND               | ND    | ND           | ND  | ND   |
| M-and/or p-xylene           | µg/L  | 1    | ND               | ND    | ND           | ND  | ND   |
| Methyl t-butyl ether (MTBE) | µg/L  | 5    | ND               | ND    | ND           | ND  | ND   |
| Methylene chloride          | µg/L  | 0.5  | ND               | ND    | ND           | ND  | ND   |
| O-Xylene                    | µg/L  | 5    | ND               | ND    | ND           | ND  | ND   |
| Styrene                     | µg/L  | 0.5  | ND               | ND    | ND           | ND  | ND   |
| Tetrachloroethene           | µg/L  | 0.5  | ND               | ND    | ND           | ND  | ND   |
| Toluene                     | µg/L  | 0.5  | ND               | ND    | ND           | ND  | ND   |

**Table S1.c** Parameter values for water samples analyzed in the Gray Water Reuse and Building DPR tests (continued). ND = Not Detected. LoD = Limit of Detection. Blue shading designates advanced treatment.

| Parameter                     | Units | LoD | Gray Water Reuse |       | Building DPR |     |     |
|-------------------------------|-------|-----|------------------|-------|--------------|-----|-----|
|                               |       |     | GW               | GWTRS | WWE          | DPR | Tap |
| Trans-1,2-Dichloroethene      | µg/L  | 0.5 | ND               | ND    | ND           | ND  | ND  |
| Trans-1,3-Dichloropropene     | µg/L  | 0.5 | ND               | ND    | ND           | ND  | ND  |
| Trichlorofluoromethane        | µg/L  | 0.5 | ND               | ND    | ND           | ND  | ND  |
| Trihalomethanes, total (TTHM) | µg/L  | 1   | 22               | ND    | 0.5          | 1.7 | ND  |
| Haloacetic Acids (HAA5)       | µg/L  | 1   | ND               | 29    | 7            | 17  | ND  |
| Vinyl chloride                | µg/L  | 0.5 | ND               | ND    | ND           | ND  | ND  |
| 2,4-Dinitrotoluene            | µg/L  | 0.5 | ND               | ND    | ND           | ND  | ND  |
| Benzo(a)pyrene                | µg/L  | 0.2 | ND               | ND    | ND           | ND  | ND  |
| Bis(2-ethylhexyl)adipate      | µg/L  | 2   | ND               | ND    | ND           | ND  | ND  |
| Bis(2-ethylhexyl)phthalate    | µg/L  | 2   | ND               | ND    | ND           | ND  | ND  |
| Hexachlorobenzene             | µg/L  | 0.2 | ND               | ND    | ND           | ND  | ND  |
| Hexachlorocyclopentadiene     | µg/L  | 0.2 | ND               | ND    | ND           | ND  | ND  |
| NDMA                          | µg/L  | 5   | ND               | ND    | ND           | ND  | ND  |
| Pentachlorophenol             | µg/L  | 0.5 | ND               | ND    | ND           | ND  | ND  |
| 4,4'-DDT                      | µg/L  | 0.5 | ND               | ND    | ND           | ND  | ND  |
| Alachlor                      | µg/L  | 0.2 | ND               | ND    | ND           | ND  | ND  |
| Atrazine                      | µg/L  | 0.2 | ND               | ND    | ND           | ND  | ND  |
| Chlordane, alpha              | µg/L  | 0.2 | ND               | ND    | ND           | ND  | ND  |
| Chlordane, gamma              | µg/L  | 0.2 | ND               | ND    | ND           | ND  | ND  |
| Endrin                        | µg/L  | 0.2 | ND               | ND    | ND           | ND  | ND  |
| Heptachlor                    | µg/L  | 0.2 | ND               | ND    | ND           | ND  | ND  |
| Heptachlor epoxide            | µg/L  | 0.2 | ND               | ND    | ND           | ND  | ND  |
| Lindane                       | µg/L  | 0.2 | ND               | ND    | ND           | ND  | ND  |
| Methoxychlor                  | µg/L  | 0.2 | ND               | ND    | ND           | ND  | ND  |
| Metolachlor                   | µg/L  | 0.5 | ND               | ND    | ND           | ND  | ND  |
| Metribuzin                    | µg/L  | 0.5 | ND               | ND    | ND           | ND  | ND  |
| Simazine                      | µg/L  | 1   | ND               | ND    | ND           | ND  | ND  |
| Toxaphene                     | µg/L  | 3   | ND               | ND    | ND           | ND  | ND  |
| Trifluralin                   | µg/L  | 0.2 | ND               | ND    | ND           | ND  | ND  |
| PCB Aroclor, Total            | µg/L  | 0.5 | ND               | ND    | ND           | ND  | ND  |
| 1,7-Dimethylxanthine          | ng/L  | 10  | 2400             | ND    | ND           | ND  | ND  |
| Acetaminophen                 | ng/L  | 5   | ND               | ND    | ND           | ND  | ND  |
| Albuterol                     | ng/L  | 5   | ND               | ND    | ND           | ND  | ND  |
| Amoxicillin                   | ng/L  | 20  | ND               | ND    | ND           | ND  | ND  |
| Androstenedione               | ng/L  | 5   | 16               | ND    | ND           | ND  | ND  |
| Atenolol                      | ng/L  | 5   | ND               | ND    | ND           | ND  | ND  |
| Atrazine                      | ng/L  | 5   | ND               | ND    | ND           | ND  | ND  |
| Bezafibrate                   | ng/L  | 5   | ND               | ND    | ND           | ND  | ND  |
| Bromacil                      | ng/L  | 5   | 2700             | ND    | ND           | ND  | ND  |

**Table S1.d** Parameter values for water samples analyzed in the Gray Water Reuse and Building DPR tests (continued). ND = Not Detected. LoD = Limit of Detection. Blue shading designates advanced treatment.

| Parameter         | Units | LoD | Gray Water Reuse |       | Building DPR |     |     |
|-------------------|-------|-----|------------------|-------|--------------|-----|-----|
|                   |       |     | GW               | GWTRS | WWE          | DPR | Tap |
| Caffeine          | ng/L  | 5   | ND               | ND    | ND           | ND  | ND  |
| Carbadox          | ng/L  | 5   | ND               | ND    | ND           | ND  | ND  |
| Carbamazepine     | ng/L  | 5   | ND               | ND    | ND           | ND  | ND  |
| Carisoprodol      | ng/L  | 5   | ND               | ND    | ND           | ND  | ND  |
| Chloridazon       | ng/L  | 5   | ND               | ND    | ND           | ND  | ND  |
| Chlorotoluron     | ng/L  | 5   | ND               | ND    | ND           | ND  | ND  |
| Cimetidine        | ng/L  | 5   | 4500             | ND    | ND           | ND  | ND  |
| Cotinine          | ng/L  | 10  | ND               | ND    | ND           | ND  | ND  |
| Cyanazine         | ng/L  | 5   | ND               | ND    | ND           | ND  | ND  |
| DACT              | ng/L  | 5   | ND               | ND    | ND           | ND  | ND  |
| DEA               | ng/L  | 5   | 8200             | 52    | 11           | ND  | ND  |
| DEET              | ng/L  | 10  | ND               | ND    | 8.1          | ND  | ND  |
| Dehydronifedipine | ng/L  | 5   | ND               | ND    | ND           | ND  | ND  |
| DIA               | ng/L  | 5   | ND               | ND    | ND           | ND  | ND  |
| Diazepam          | ng/L  | 5   | ND               | ND    | ND           | ND  | ND  |
| Dilantin          | ng/L  | 20  | ND               | ND    | ND           | ND  | ND  |
| Diltiazem         | ng/L  | 5   | ND               | ND    | ND           | ND  | ND  |
| Diuron            | ng/L  | 5   | ND               | ND    | ND           | ND  | ND  |
| Erythromycin      | ng/L  | 10  | ND               | ND    | ND           | ND  | ND  |
| Flumequine        | ng/L  | 10  | ND               | ND    | ND           | ND  | ND  |
| Fluoxetine        | ng/L  | 10  | ND               | ND    | ND           | ND  | ND  |
| Isoproturon       | ng/L  | 100 | ND               | ND    | ND           | ND  | ND  |
| Ketoprofen        | ng/L  | 5   | ND               | ND    | ND           | ND  | ND  |
| Ketorolac         | ng/L  | 5   | 230              | ND    | ND           | ND  | ND  |
| Lidocaine         | ng/L  | 5   | ND               | ND    | ND           | 18  | ND  |
| Lincomycin        | ng/L  | 10  | ND               | ND    | ND           | ND  | ND  |
| Linuron           | ng/L  | 5   | ND               | ND    | 36           | ND  | ND  |
| Lopressor         | ng/L  | 20  | ND               | ND    | ND           | ND  | ND  |
| Meclofenamic acid | ng/L  | 5   | ND               | ND    | ND           | ND  | ND  |
| Meprobamate       | ng/L  | 5   | ND               | ND    | ND           | ND  | ND  |
| Metazachlor       | ng/L  | 5   | 180              | ND    | ND           | ND  | ND  |
| Metformin         | ng/L  | 5   | ND               | ND    | ND           | ND  | ND  |
| Metolachlor       | ng/L  | 5   | ND               | ND    | ND           | ND  | ND  |
| Nifedipine        | ng/L  | 20  | ND               | ND    | ND           | ND  | ND  |
| Norethisterone    | ng/L  | 5   | ND               | ND    | ND           | ND  | ND  |
| OUST              | ng/L  | 5   | ND               | ND    | ND           | ND  | ND  |
| Oxolinic acid     | ng/L  | 10  | ND               | ND    | ND           | ND  | ND  |
| Pentoxifylline    | ng/L  | 5   | ND               | ND    | ND           | ND  | ND  |

**Table S1.e** Parameter values for water samples analyzed in the Gray Water Reuse and Building DPR tests (continued). ND = Not Detected. LoD = Limit of Detection. Blue shading designates advanced treatment.

| Parameter                  | Units | LoD | Gray Water Reuse |       | Building DPR |     |     |
|----------------------------|-------|-----|------------------|-------|--------------|-----|-----|
|                            |       |     | GW               | GWTRS | WWE          | DPR | Tap |
| Phenazone                  | ng/L  | 5   | ND               | ND    | ND           | ND  | ND  |
| Primidone                  | ng/L  | 5   | ND               | ND    | ND           | ND  | ND  |
| Progesterone               | ng/L  | 5   | ND               | ND    | ND           | ND  | ND  |
| Propazine                  | ng/L  | 5   | ND               | ND    | ND           | ND  | ND  |
| Quinoline                  | ng/L  | 5   | ND               | ND    | ND           | ND  | ND  |
| Simazine                   | ng/L  | 5   | ND               | ND    | ND           | ND  | ND  |
| Sulfachloropyridazine      | ng/L  | 5   | ND               | ND    | ND           | ND  | ND  |
| Sulfadiazine               | ng/L  | 5   | ND               | ND    | ND           | ND  | ND  |
| Sulfadimethoxine           | ng/L  | 5   | ND               | ND    | ND           | ND  | ND  |
| Sulfamerazine              | ng/L  | 5   | ND               | ND    | ND           | ND  | ND  |
| Sulfamethazine             | ng/L  | 5   | ND               | ND    | ND           | ND  | ND  |
| Sulfamethizole             | ng/L  | 5   | ND               | ND    | ND           | ND  | ND  |
| Sulfamethoxazole           | ng/L  | 5   | ND               | ND    | ND           | ND  | ND  |
| Sulfathiazole              | ng/L  | 5   | ND               | ND    | ND           | 13  | ND  |
| TCEP                       | ng/L  | 10  | ND               | ND    | 840          | 130 | ND  |
| TCPP                       | ng/L  | 100 | 160              | ND    | ND           | ND  | ND  |
| TDCPP                      | ng/L  | 100 | ND               | ND    | ND           | ND  | ND  |
| Testosterone               | ng/L  | 5   | ND               | ND    | 33           | ND  | ND  |
| Theobromine                | ng/L  | 10  | 1400             | ND    | ND           | ND  | ND  |
| Theophylline               | ng/L  | 20  | ND               | ND    | ND           | ND  | ND  |
| Thiabendazole              | ng/L  | 5   | ND               | ND    | ND           | ND  | ND  |
| Trimethoprim               | ng/L  | 5   | 32               | ND    | ND           | ND  | ND  |
| 2,4-D                      | ng/L  | 5   | 960              | 380   | ND           | ND  | ND  |
| 4-nonylphenol              | ng/L  | 100 | 260              | ND    | ND           | ND  | ND  |
| 4-tert-Octylphenol         | ng/L  | 50  | 24000            | ND    | 600          | ND  | ND  |
| Acesulfame-K               | ng/L  | 20  | ND               | ND    | ND           | ND  | ND  |
| Bendroflumethiazide        | ng/L  | 5   | 370              | ND    | 24           | ND  | ND  |
| BPA                        | ng/L  | 10  | ND               | ND    | 7.1          | ND  | ND  |
| Butalbital                 | ng/L  | 5   | ND               | ND    | ND           | ND  | ND  |
| Butylparaben               | ng/L  | 5   | ND               | ND    | ND           | ND  | ND  |
| Chloramphenicol            | ng/L  | 10  | ND               | ND    | ND           | ND  | ND  |
| Clofibric Acid             | ng/L  | 5   | ND               | ND    | ND           | ND  | ND  |
| Diclofenac                 | ng/L  | 5   | ND               | ND    | ND           | ND  | ND  |
| Estradiol                  | ng/L  | 5   | ND               | ND    | ND           | ND  | ND  |
| Estriol                    | ng/L  | 5   | ND               | ND    | ND           | ND  | ND  |
| Estrone                    | ng/L  | 5   | ND               | ND    | ND           | ND  | ND  |
| Ethinyl Estradiol 17 alpha | ng/L  | 5   | ND               | ND    | ND           | ND  | ND  |
| Ethylparaben               | ng/L  | 20  | ND               | ND    | ND           | ND  | ND  |

**Table S1.f** Parameter values for water samples analyzed in the Gray Water Reuse and Building DPR tests (continued). ND = Not Detected. LoD = Limit of Detection. Blue shading designates advanced treatment.

| Parameter       | Units | LoD | Gray Water Reuse |       | Building DPR |     |     |
|-----------------|-------|-----|------------------|-------|--------------|-----|-----|
|                 |       |     | GW               | GWTRS | WWE          | DPR | Tap |
| Gemfibrozil     | ng/L  | 5   | 11000            | ND    | ND           | ND  | ND  |
| Ibuprofen       | ng/L  | 10  | ND               | ND    | ND           | 21  | ND  |
| Iohexal         | ng/L  | 10  | ND               | ND    | ND           | ND  | ND  |
| Iopromide       | ng/L  | 5   | ND               | ND    | ND           | ND  | ND  |
| Isobutylparaben | ng/L  | 5   | ND               | ND    | ND           | ND  | ND  |
| Methylparaben   | ng/L  | 20  | 2100             | ND    | ND           | ND  | ND  |
| Naproxen        | ng/L  | 10  | 1100             | ND    | ND           | ND  | 7   |
| Propylparaben   | ng/L  | 5   | ND               | ND    | ND           | ND  | ND  |
| Salicylic Acid  | ng/L  | 100 | 7400             | ND    | 60000        | ND  | ND  |
| Sucralose       | ng/L  | 100 | ND               | ND    | ND           | ND  | ND  |
| Triclocarban    | ng/L  | 5   | 100              | ND    | ND           | ND  | ND  |
| Triclosan       | ng/L  | 10  | ND               | ND    | ND           | ND  | ND  |
| Warfarin        | ng/L  | 5   | ND               | ND    | ND           | ND  | ND  |
| PFOA            | ng/L  | 2   | ND               | ND    | ND           | ND  | ND  |
| PFOS            | ng/L  | 2   | 0                | 0     | 0            | 0   | 0   |

**Table S2.a** Parameter values for water samples analyzed in the controlled tests of the Mobile DPR Trailer (DPRT) using Synthetic Wastewater Effluent (SWWE). ND = Not Detected. LoD = Limit of Detection.

| Parameter              | Units | LoD   | Lab Testing of DPR Trailer with Synthetic WWE |        |        |        |        |        |               |
|------------------------|-------|-------|-----------------------------------------------|--------|--------|--------|--------|--------|---------------|
|                        |       |       | SWWE 1                                        | SWWE 2 | SSWE 3 | DPRT 1 | DPRT 2 | DPRT 3 | DPR, no NaOCl |
| Aluminum               | mg/L  | 0.05  | ND                                            | ND     | ND     | ND     | ND     | ND     | ND            |
| Antimony               | mg/L  | 0.006 | ND                                            | ND     | ND     | ND     | ND     | ND     | ND            |
| Arsenic                | mg/L  | 0.002 | ND                                            | ND     | ND     | ND     | ND     | ND     | ND            |
| Barium                 | mg/L  | 0.05  | ND                                            | ND     | ND     | ND     | ND     | ND     | ND            |
| Beryllium              | mg/L  | 0.002 | ND                                            | ND     | ND     | ND     | ND     | ND     | ND            |
| Boron                  | mg/L  | 0.01  | ND                                            | ND     | ND     | ND     | ND     | ND     | ND            |
| Cadmium                | mg/L  | 0.001 | ND                                            | ND     | ND     | ND     | ND     | ND     | ND            |
| Calcium                | mg/L  | 0.1   | 11.3                                          | 19.4   | 22.4   | ND     | ND     | ND     | ND            |
| Cesium                 | mg/L  | 0.02  | ND                                            | ND     | ND     | ND     | ND     | ND     | ND            |
| Chromium               | mg/L  | 0.01  | ND                                            | ND     | ND     | ND     | ND     | ND     | ND            |
| Copper                 | mg/L  | 0.02  | 0.012                                         | 0.008  | 0.005  | ND     | ND     | ND     | ND            |
| Iron                   | mg/L  | 0.01  | ND                                            | ND     | 0.023  | ND     | ND     | ND     | ND            |
| Lead                   | mg/L  | 0.001 | ND                                            | ND     | ND     | ND     | ND     | ND     | ND            |
| Magnesium              | mg/L  | 0.1   | 18.2                                          | 11.25  | 24.32  | 0.12   | ND     | ND     | ND            |
| Manganese              | mg/L  | 0.005 | ND                                            | 0.075  | 0.009  | ND     | ND     | ND     | ND            |
| Mercury                | ug/L  | 0.025 | ND                                            | ND     | ND     | ND     | ND     | ND     | ND            |
| Molybdenum             | mg/L  | 0.02  | ND                                            | ND     | ND     | ND     | ND     | ND     | ND            |
| Nickel                 | mg/L  | 0.02  | ND                                            | ND     | ND     | ND     | ND     | ND     | ND            |
| Potassium              | mg/L  | 0.1   | ND                                            | ND     | ND     | ND     | ND     | ND     | ND            |
| Selenium               | mg/L  | 0.005 | ND                                            | ND     | ND     | ND     | ND     | ND     | ND            |
| Silver                 | mg/L  | 0.005 | ND                                            | ND     | ND     | ND     | ND     | ND     | ND            |
| Sodium                 | mg/L  | 0.1   | 52                                            | 43     | 69     | 72     | 51     | 18     | 15            |
| Strontium              | mg/L  | 0.001 | 0.111                                         | 0.225  | 0.261  | 0.002  | ND     | ND     | 0.001         |
| Sulfur                 | mg/L  | 0.2   | ND                                            | ND     | ND     | ND     | ND     | ND     | ND            |
| Thallium               | mg/L  | 0.002 | ND                                            | ND     | ND     | ND     | ND     | ND     | ND            |
| Uranium                | mg/L  | 0.005 | 0.002                                         | ND     | 0.001  | ND     | ND     | ND     | ND            |
| Zinc                   | mg/L  | 0.02  | 0.015                                         | ND     | 0.035  | 0.006  | ND     | ND     | ND            |
| Alkalinity             | mg/L  | 10    | ND                                            | 200    | 240    | ND     | ND     | ND     | 220           |
| Bromide                | mg/L  | 0.1   | ND                                            | ND     | 1.1    | ND     | ND     | 0.6    | ND            |
| Chlorate               | mg/L  | 0.05  | ND                                            | ND     | ND     | ND     | ND     | ND     | ND            |
| Chloride               | mg/L  | 0.2   | 22                                            | 31     | 65     | 99     | ND     | 6.2    | ND            |
| Fluoride               | mg/L  | 0.05  | 0.6                                           | 0.8    | 1.6    | ND     | ND     | ND     | ND            |
| Hardness               | mg/L  | 10    | 110                                           | 95     | 160    | ND     | ND     | ND     | ND            |
| Nitrate                | mg/L  | 0.1   | ND                                            | ND     | ND     | ND     | ND     | ND     | ND            |
| Nitrite                | mg/L  | 0.1   | ND                                            | ND     | ND     | ND     | ND     | ND     | ND            |
| pH                     | s.u.  | -     | ND                                            | 8.1    | 7.4    | 8.6    | 7.4    | 3.5    | 4.5           |
| Silica                 | mg/L  | 0.1   | ND                                            | ND     | ND     | ND     | ND     | ND     | ND            |
| Sulfate                | mg/L  | 0.5   | 6.1                                           | 13     | 53     | ND     | ND     | ND     | ND            |
| Total Dissolved Solids | mg/L  | 10    | ND                                            | 250    | 390    | 170    | 51     | 65     | 36            |

**Table S2.b** Parameter values for water samples analyzed in the controlled tests of the Mobile DPR Trailer (DPRT) using Synthetic Wastewater Effluent (SWWE) (Continued). ND = Not Detected. LoD = Limit of Detection. Blue shading designates advanced treatment.

| Parameter                   | Units | LoD  | Lab Testing of DPR Trailer with Synthetic WWE |        |        |        |        |        |               |
|-----------------------------|-------|------|-----------------------------------------------|--------|--------|--------|--------|--------|---------------|
|                             |       |      | SWWE 1                                        | SWWE 2 | SSWE 3 | DPRT 1 | DPRT 2 | DPRT 3 | DPR, no NaOCl |
| Total Organic Carbon        | mg/L  | 0.05 | 6.4                                           | 9.5    | 9.4    | 0.8    | 0.95   | 0.43   | 0.46          |
| 1,1,1-Trichloroethane       | µg/L  | 0.5  | ND                                            | ND     | ND     | ND     | ND     | ND     | 180           |
| 1,1,2,2-Tetrachloroethane   | µg/L  | 0.5  | ND                                            | ND     | ND     | ND     | ND     | ND     | ND            |
| 1,1,2-Trichloroethane       | µg/L  | 0.5  | ND                                            | ND     | ND     | ND     | ND     | ND     | ND            |
| 1,1-Dichloroethane          | µg/L  | 0.5  | ND                                            | ND     | ND     | ND     | ND     | ND     | ND            |
| 1,1-Dichloroethene          | µg/L  | 0.5  | ND                                            | ND     | ND     | ND     | ND     | ND     | ND            |
| 1,2,3-Trichloropropane      | µg/L  | 0.5  | ND                                            | ND     | ND     | ND     | ND     | ND     | ND            |
| 1,2,4-Trichlorobenzene      | µg/L  | 0.5  | ND                                            | ND     | ND     | ND     | ND     | ND     | ND            |
| 1,2-Dibromo-3-chloropropane | µg/L  | 0.2  | ND                                            | ND     | ND     | ND     | ND     | ND     | ND            |
| 1,2-Dichlorobenzene         | µg/L  | 0.5  | ND                                            | ND     | ND     | ND     | ND     | ND     | ND            |
| 1,2-Dichloroethane          | µg/L  | 0.5  | ND                                            | ND     | ND     | ND     | ND     | ND     | ND            |
| 1,2-Dichloropropane         | µg/L  | 0.5  | ND                                            | ND     | ND     | ND     | ND     | ND     | ND            |
| 1,3-Dichlorobenzene         | µg/L  | 0.5  | ND                                            | ND     | ND     | ND     | ND     | ND     | ND            |
| 1,3-Dichloropropane         | µg/L  | 0.5  | ND                                            | ND     | ND     | ND     | ND     | ND     | ND            |
| 1,4-Dichlorobenzene         | µg/L  | 0.5  | ND                                            | ND     | ND     | ND     | ND     | ND     | ND            |
| Acrolein                    | µg/L  | 20   | ND                                            | ND     | ND     | ND     | ND     | ND     | ND            |
| Acrylonitrile               | µg/L  | 2    | ND                                            | ND     | ND     | ND     | ND     | ND     | ND            |
| Benzene                     | µg/L  | 0.5  | ND                                            | ND     | ND     | ND     | ND     | 0.002  | ND            |
| Bromodichloromethane        | µg/L  | 1    | 4                                             | ND     | 3      | ND     | ND     | ND     | ND            |
| Bromoform                   | µg/L  | 1    | ND                                            | ND     | ND     | ND     | ND     | ND     | 2             |
| Carbon tetrachloride        | µg/L  | 0.5  | ND                                            | ND     | ND     | ND     | ND     | ND     | ND            |
| Chloroform                  | µg/L  | 0.5  | 23                                            | 8      | 12     | 0.004  | 0.002  | ND     | ND            |
| Chlorobenzene               | µg/L  | 0.5  | ND                                            | ND     | ND     | ND     | ND     | ND     | ND            |
| Cis-1,2-Dichloroethene      | µg/L  | 0.5  | ND                                            | ND     | ND     | ND     | ND     | ND     | ND            |
| Cis-1,3-Dichloropropene     | µg/L  | 0.5  | ND                                            | ND     | ND     | ND     | ND     | ND     | ND            |
| Dibromochloromethane        | µg/L  | 1    | ND                                            | ND     | ND     | ND     | ND     | ND     | ND            |
| Ethylbenzene                | µg/L  | 0.5  | ND                                            | ND     | ND     | ND     | ND     | ND     | ND            |
| Ethylene dibromide          | µg/L  | 0.2  | ND                                            | ND     | ND     | ND     | ND     | ND     | ND            |
| Hexachlorobutadiene         | µg/L  | 0.2  | ND                                            | ND     | ND     | ND     | ND     | ND     | ND            |
| M-and/or p-xylene           | µg/L  | 1    | ND                                            | ND     | ND     | ND     | ND     | ND     | ND            |
| Methyl t-butyl ether (MTBE) | µg/L  | 5    | ND                                            | ND     | ND     | ND     | ND     | ND     | ND            |
| Methylene chloride          | µg/L  | 0.5  | ND                                            | ND     | ND     | ND     | ND     | ND     | ND            |
| O-Xylene                    | µg/L  | 5    | ND                                            | ND     | ND     | ND     | ND     | ND     | ND            |
| Styrene                     | µg/L  | 0.5  | ND                                            | ND     | ND     | ND     | ND     | ND     | ND            |
| Tetrachloroethene           | µg/L  | 0.5  | ND                                            | ND     | ND     | ND     | ND     | ND     | ND            |
| Toluene                     | µg/L  | 0.5  | ND                                            | 1      | 1      | 32     | ND     | 46     | ND            |
| Trans-1,2-Dichloroethene    | µg/L  | 0.5  | ND                                            | ND     | ND     | ND     | ND     | ND     | ND            |
| Trans-1,3-Dichloropropene   | µg/L  | 0.5  | ND                                            | ND     | ND     | ND     | ND     | ND     | 56            |



**Table S2.c** Parameter values for water samples analyzed in the controlled tests of the Mobile DPR Trailer (DPRT) using Synthetic Wastewater Effluent (SWWE) (Continued). ND = Not Detected. LoD = Limit of Detection.

| Parameter                     | Units | LoD | Lab Testing of DPR Trailer with Synthetic WWE |        |        |        |        |        |               |
|-------------------------------|-------|-----|-----------------------------------------------|--------|--------|--------|--------|--------|---------------|
|                               |       |     | SWWE 1                                        | SWWE 2 | SSWE 3 | DPRT 1 | DPRT 2 | DPRT 3 | DPR, no NaOCl |
| Trichloroethene               | µg/L  | 0.5 | ND                                            | ND     | ND     | ND     | ND     | ND     | ND            |
| Trichlorofluoromethane        | µg/L  | 0.5 | ND                                            | ND     | ND     | ND     | ND     | ND     | ND            |
| Trihalomethanes, total (TTHM) | µg/L  | 1   | 27                                            | 8      | 15     | 4      | 2      | ND     | 2             |
| Haloacetic Acids (HAA5)       | µg/L  | 1   | 65                                            | 78     | 11     | 189    | 7      | ND     | ND            |
| Vinyl chloride                | µg/L  | 0.5 | ND                                            | ND     | ND     | ND     | ND     | ND     | ND            |
| 2,4-Dinitrotoluene            | µg/L  | 0.5 | ND                                            | ND     | ND     | ND     | ND     | ND     | ND            |
| Benzo(a)pyrene                | µg/L  | 0.2 | ND                                            | ND     | ND     | ND     | ND     | ND     | ND            |
| Bis(2-ethylhexyl)adipate      | µg/L  | 2   | ND                                            | ND     | ND     | ND     | ND     | ND     | ND            |
| Bis(2-ethylhexyl)phthalate    | µg/L  | 2   | ND                                            | ND     | ND     | ND     | ND     | ND     | ND            |
| Hexachlorobenzene             | µg/L  | 0.2 | ND                                            | ND     | ND     | ND     | ND     | ND     | ND            |
| Hexachlorocyclopentadiene     | µg/L  | 0.2 | ND                                            | ND     | ND     | ND     | ND     | ND     | ND            |
| NDMA                          | µg/L  | 5   | ND                                            | ND     | ND     | ND     | ND     | ND     | ND            |
| Pentachlorophenol             | µg/L  | 0.5 | ND                                            | ND     | ND     | ND     | ND     | ND     | ND            |
| 4,4'-DDT                      | µg/L  | 0.5 | ND                                            | ND     | ND     | ND     | ND     | ND     | ND            |
| Alachlor                      | µg/L  | 0.2 | ND                                            | ND     | ND     | ND     | ND     | ND     | ND            |
| Atrazine                      | µg/L  | 0.2 | ND                                            | ND     | ND     | ND     | ND     | ND     | ND            |
| Chlordane, alpha              | µg/L  | 0.2 | ND                                            | ND     | ND     | ND     | ND     | ND     | ND            |
| Chlordane, gamma              | µg/L  | 0.2 | ND                                            | ND     | ND     | ND     | ND     | ND     | ND            |
| Endrin                        | µg/L  | 0.2 | ND                                            | ND     | ND     | ND     | ND     | ND     | ND            |
| Heptachlor                    | µg/L  | 0.2 | ND                                            | ND     | ND     | ND     | ND     | ND     | ND            |
| Heptachlor epoxide            | µg/L  | 0.2 | ND                                            | ND     | ND     | ND     | ND     | ND     | ND            |
| Lindane                       | µg/L  | 0.2 | ND                                            | ND     | ND     | ND     | ND     | ND     | ND            |
| Methoxychlor                  | µg/L  | 0.2 | ND                                            | ND     | ND     | ND     | ND     | ND     | ND            |
| Metolachlor                   | µg/L  | 0.5 | ND                                            | ND     | ND     | ND     | ND     | ND     | ND            |
| Metribuzin                    | µg/L  | 0.5 | ND                                            | ND     | ND     | ND     | ND     | ND     | ND            |
| Simazine                      | µg/L  | 1   | ND                                            | ND     | ND     | ND     | ND     | ND     | ND            |
| Toxaphene                     | µg/L  | 3   | ND                                            | ND     | ND     | ND     | ND     | ND     | ND            |
| Trifluralin                   | µg/L  | 0.2 | ND                                            | ND     | ND     | ND     | ND     | ND     | ND            |
| PCB Aroclor, Total            | µg/L  | 0.5 | ND                                            | ND     | ND     | ND     | ND     | ND     | ND            |
| 1,7-Dimethylxanthine          | ng/L  | 10  | ND                                            | ND     | ND     | ND     | ND     | ND     | ND            |
| Acetaminophen                 | ng/L  | 5   | 2400                                          | 1100   | 1700   | ND     | ND     | ND     | ND            |
| Albuterol                     | ng/L  | 5   | ND                                            | ND     | ND     | ND     | ND     | ND     | ND            |
| Amoxicillin                   | ng/L  | 20  | ND                                            | ND     | ND     | ND     | ND     | ND     | ND            |
| Androstenedione               | ng/L  | 5   | ND                                            | ND     | ND     | ND     | ND     | ND     | ND            |
| Atenolol                      | ng/L  | 5   | ND                                            | ND     | ND     | ND     | ND     | ND     | ND            |
| Atrazine                      | ng/L  | 5   | ND                                            | ND     | 5.1    | ND     | ND     | ND     | ND            |
| Bezafibrate                   | ng/L  | 5   | ND                                            | ND     | ND     | ND     | ND     | ND     | ND            |
| Bromacil                      | ng/L  | 5   | ND                                            | ND     | ND     | ND     | ND     | ND     | ND            |

**Table S2.d** Parameter values for water samples analyzed in the controlled tests of the Mobile DPR Trailer (DPRT) using Synthetic Wastewater Effluent (SWWE) (Continued). ND = Not Detected. LoD = Limit of Detection.

| Parameter         | Units | LoD | Lab Testing of DPR Trailer with Synthetic WWE |           |           |           |           |           |                     |
|-------------------|-------|-----|-----------------------------------------------|-----------|-----------|-----------|-----------|-----------|---------------------|
|                   |       |     | SWWE<br>1                                     | SWWE<br>2 | SSWE<br>3 | DPRT<br>1 | DPRT<br>2 | DPRT<br>3 | DPR,<br>no<br>NaOCl |
| Caffeine          | ng/L  | 5   | 1600                                          | 580       | 1100      | ND        | 11        | ND        | ND                  |
| Carbadox          | ng/L  | 5   | ND                                            | ND        | ND        | ND        | ND        | ND        | ND                  |
| Carbamazepine     | ng/L  | 5   | ND                                            | ND        | ND        | ND        | ND        | ND        | ND                  |
| Carisoprodol      | ng/L  | 5   | ND                                            | ND        | ND        | ND        | ND        | ND        | ND                  |
| Chloridazon       | ng/L  | 5   | ND                                            | ND        | ND        | ND        | ND        | ND        | ND                  |
| Chlorotoluron     | ng/L  | 5   | ND                                            | ND        | ND        | ND        | ND        | ND        | ND                  |
| Cimetidine        | ng/L  | 5   | ND                                            | ND        | ND        | ND        | ND        | 12        | ND                  |
| Cotinine          | ng/L  | 10  | ND                                            | ND        | ND        | ND        | ND        | ND        | ND                  |
| Cyanazine         | ng/L  | 5   | ND                                            | ND        | ND        | ND        | ND        | ND        | ND                  |
| DACT              | ng/L  | 5   | ND                                            | 54        | ND        | ND        | ND        | ND        | ND                  |
| DEA               | ng/L  | 5   | ND                                            | ND        | ND        | ND        | ND        | ND        | ND                  |
| DEET              | ng/L  | 10  | 4000                                          | 1800      | 2800      | ND        | 14        | ND        | ND                  |
| Dehydronifedipine | ng/L  | 5   | ND                                            | ND        | ND        | ND        | ND        | ND        | ND                  |
| DIA               | ng/L  | 5   | ND                                            | ND        | ND        | ND        | ND        | ND        | ND                  |
| Diazepam          | ng/L  | 5   | ND                                            | ND        | ND        | ND        | ND        | ND        | ND                  |
| Dilantin          | ng/L  | 20  | ND                                            | ND        | ND        | ND        | ND        | ND        | ND                  |
| Diltiazem         | ng/L  | 5   | ND                                            | ND        | ND        | ND        | ND        | ND        | ND                  |
| Diuron            | ng/L  | 5   | ND                                            | 39        | 25        | ND        | ND        | ND        | ND                  |
| Erythromycin      | ng/L  | 10  | ND                                            | ND        | ND        | ND        | ND        | ND        | ND                  |
| Flumequine        | ng/L  | 10  | ND                                            | ND        | ND        | ND        | ND        | ND        | ND                  |
| Fluoxetine        | ng/L  | 10  | ND                                            | ND        | ND        | ND        | ND        | ND        | ND                  |
| Isoproturon       | ng/L  | 100 | ND                                            | ND        | ND        | ND        | ND        | ND        | ND                  |
| Ketoprofen        | ng/L  | 5   | ND                                            | ND        | ND        | ND        | ND        | ND        | ND                  |
| Ketorolac         | ng/L  | 5   | ND                                            | ND        | ND        | ND        | ND        | ND        | ND                  |
| Lidocaine         | ng/L  | 5   | 19                                            | 23        | 12        | ND        | ND        | ND        | ND                  |
| Lincomycin        | ng/L  | 10  | ND                                            | ND        | ND        | ND        | ND        | ND        | ND                  |
| Linuron           | ng/L  | 5   | ND                                            | ND        | ND        | ND        | ND        | ND        | ND                  |
| Lopressor         | ng/L  | 20  | ND                                            | 130       | 350       | ND        | ND        | ND        | ND                  |
| Meclofenamic acid | ng/L  | 5   | ND                                            | ND        | ND        | ND        | ND        | ND        | ND                  |
| Meprobamate       | ng/L  | 5   | ND                                            | ND        | ND        | ND        | ND        | ND        | ND                  |
| Metazachlor       | ng/L  | 5   | ND                                            | ND        | ND        | ND        | ND        | ND        | ND                  |
| Metformin         | ng/L  | 5   | 82                                            | ND        | 96        | 5.6       | ND        | 7         | ND                  |
| Metolachlor       | ng/L  | 5   | ND                                            | ND        | ND        | ND        | ND        | 5.1       | ND                  |
| Nifedipine        | ng/L  | 20  | ND                                            | ND        | ND        | ND        | ND        | ND        | ND                  |
| Norethisterone    | ng/L  | 5   | ND                                            | ND        | ND        | ND        | ND        | ND        | ND                  |
| OUST              | ng/L  | 5   | ND                                            | ND        | ND        | ND        | ND        | ND        | ND                  |

**Table S2.e** Parameter values for water samples analyzed in the controlled tests of the Mobile DPR Trailer (DPRT) using Synthetic Wastewater Effluent (SWWE) (Continued). ND = Not Detected. LoD = Limit of Detection.

| Parameter             | Units | LoD | Lab Testing of DPR Trailer with Synthetic WWE |        |        |        |        |        |               |
|-----------------------|-------|-----|-----------------------------------------------|--------|--------|--------|--------|--------|---------------|
|                       |       |     | SWWE 1                                        | SWWE 2 | SSWE 3 | DPRT 1 | DPRT 2 | DPRT 3 | DPR, no NaOCl |
| Oxolinic acid         | ng/L  | 10  | ND                                            | ND     | ND     | ND     | ND     | ND     | ND            |
| Pentoxifylline        | ng/L  | 5   | ND                                            | ND     | ND     | ND     | ND     | ND     | ND            |
| Phenazone             | ng/L  | 5   | ND                                            | ND     | ND     | ND     | ND     | ND     | ND            |
| Primidone             | ng/L  | 5   | ND                                            | ND     | ND     | ND     | ND     | ND     | ND            |
| Progesterone          | ng/L  | 5   | ND                                            | ND     | ND     | ND     | ND     | ND     | ND            |
| Propazine             | ng/L  | 5   | ND                                            | ND     | ND     | ND     | ND     | ND     | ND            |
| Quinoline             | ng/L  | 5   | ND                                            | ND     | 24     | ND     | ND     | ND     | ND            |
| Simazine              | ng/L  | 5   | ND                                            | ND     | ND     | ND     | ND     | ND     | ND            |
| Sulfachloropyridazine | ng/L  | 5   | ND                                            | ND     | ND     | ND     | ND     | ND     | ND            |
| Sulfadiazine          | ng/L  | 5   | ND                                            | ND     | ND     | ND     | ND     | ND     | ND            |
| Sulfadimethoxine      | ng/L  | 5   | ND                                            | ND     | ND     | ND     | ND     | ND     | ND            |
| Sulfamerazine         | ng/L  | 5   | ND                                            | ND     | ND     | ND     | ND     | ND     | ND            |
| Sulfamethazine        | ng/L  | 5   | ND                                            | ND     | ND     | ND     | ND     | ND     | ND            |
| Sulfamethizole        | ng/L  | 5   | ND                                            | ND     | ND     | ND     | ND     | ND     | ND            |
| Sulfamethoxazole      | ng/L  | 5   | ND                                            | ND     | ND     | ND     | ND     | ND     | ND            |
| Sulfathiazole         | ng/L  | 5   | ND                                            | ND     | ND     | ND     | ND     | ND     | ND            |
| TCEP                  | ng/L  | 10  | ND                                            | ND     | 11     | ND     | ND     | 130    | 33            |
| T CPP                 | ng/L  | 100 | ND                                            | ND     | 120    | ND     | ND     | 920    | 230           |
| TDCPP                 | ng/L  | 100 | ND                                            | ND     | ND     | ND     | ND     | ND     | ND            |
| Testosterone          | ng/L  | 5   | ND                                            | ND     | ND     | ND     | ND     | ND     | ND            |
| Theobromine           | ng/L  | 10  | ND                                            | ND     | ND     | ND     | ND     | ND     | ND            |
| Theophylline          | ng/L  | 20  | ND                                            | ND     | ND     | ND     | ND     | ND     | ND            |
| Thiabendazole         | ng/L  | 5   | ND                                            | ND     | ND     | ND     | ND     | ND     | ND            |
| Trimethoprim          | ng/L  | 5   | ND                                            | ND     | ND     | ND     | ND     | ND     | ND            |
| 2,4-D                 | ng/L  | 5   | ND                                            | ND     | ND     | ND     | ND     | ND     | ND            |
| 4-nonylphenol         | ng/L  | 100 | ND                                            | ND     | ND     | ND     | ND     | ND     | ND            |
| 4-tert-Octylphenol    | ng/L  | 50  | ND                                            | ND     | ND     | ND     | ND     | ND     | ND            |
| Acesulfame-K          | ng/L  | 20  | 500                                           | 280    | 540    | ND     | ND     | ND     | ND            |
| Bendroflumethiazide   | ng/L  | 5   | ND                                            | ND     | ND     | ND     | ND     | ND     | ND            |
| BPA                   | ng/L  | 10  | ND                                            | ND     | 2100   | ND     | ND     | ND     | 79            |
| Butalbital            | ng/L  | 5   | ND                                            | ND     | ND     | ND     | ND     | ND     | ND            |
| Butylparaben          | ng/L  | 5   | ND                                            | ND     | ND     | ND     | ND     | ND     | ND            |
| Chloramphenicol       | ng/L  | 10  | ND                                            | ND     | ND     | ND     | ND     | ND     | ND            |
| Clofibric Acid        | ng/L  | 5   | ND                                            | ND     | ND     | ND     | ND     | ND     | ND            |
| Diclofenac            | ng/L  | 5   | ND                                            | ND     | ND     | ND     | ND     | ND     | ND            |
| Estradiol             | ng/L  | 5   | ND                                            | ND     | ND     | ND     | ND     | ND     | ND            |
| Estriol               | ng/L  | 5   | ND                                            | ND     | ND     | ND     | ND     | ND     | ND            |

**Table S2.f** Parameter values for water samples analyzed in the controlled tests of the Mobile DPR Trailer (DPRT) using Synthetic Wastewater Effluent (SWWE) (Continued). ND = Not Detected. LoD = Limit of Detection.

| Parameter                  | Units | LoD | Lab Testing of DPR Trailer with Synthetic WWE |        |        |        |        |        |               |
|----------------------------|-------|-----|-----------------------------------------------|--------|--------|--------|--------|--------|---------------|
|                            |       |     | SWWE 1                                        | SWWE 2 | SSWE 3 | DPRT 1 | DPRT 2 | DPRT 3 | DPR, no NaOCl |
| Estriol                    | ng/L  | 5   | ND                                            | ND     | ND     | ND     | ND     | ND     | ND            |
| Estrone                    | ng/L  | 5   | ND                                            | ND     | ND     | ND     | ND     | ND     | ND            |
| Ethinyl Estradiol 17 alpha | ng/L  | 5   | ND                                            | ND     | ND     | ND     | ND     | ND     | ND            |
| Ethylparaben               | ng/L  | 20  | ND                                            | ND     | ND     | ND     | ND     | ND     | ND            |
| Gemfibrozil                | ng/L  | 5   | ND                                            | ND     | ND     | ND     | ND     | ND     | ND            |
| Ibuprofen                  | ng/L  | 10  | ND                                            | 1200   | 2400   | ND     | ND     | ND     | ND            |
| Iohexal                    | ng/L  | 10  | ND                                            | ND     | ND     | ND     | ND     | ND     | ND            |
| Iopromide                  | ng/L  | 5   | ND                                            | ND     | ND     | ND     | ND     | ND     | ND            |
| Isobutylparaben            | ng/L  | 5   | ND                                            | ND     | ND     | ND     | ND     | ND     | ND            |
| Methylparaben              | ng/L  | 20  | ND                                            | ND     | ND     | ND     | ND     | ND     | ND            |
| Naproxen                   | ng/L  | 10  | ND                                            | ND     | ND     | ND     | ND     | ND     | ND            |
| Propylparaben              | ng/L  | 5   | 6.8                                           | ND     | ND     | ND     | ND     | ND     | ND            |
| Salicylic Acid             | ng/L  | 100 | 2000                                          | 1500   | ND     | ND     | ND     | ND     | 110           |
| Sucralose                  | ng/L  | 100 | 1700                                          | 890    | 900    | ND     | ND     | ND     | ND            |
| Triclocarban               | ng/L  | 5   | ND                                            | ND     | ND     | ND     | ND     | ND     | ND            |
| Triclosan                  | ng/L  | 10  | ND                                            | ND     | ND     | ND     | ND     | ND     | ND            |
| Warfarin                   | ng/L  | 5   | ND                                            | ND     | ND     | ND     | ND     | ND     | ND            |
| PFOA                       | ng/L  | 2   | ND                                            | ND     | ND     | ND     | ND     | ND     | ND            |
| PFOS                       | ng/L  | 2   | ND                                            | ND     | ND     | ND     | ND     | ND     | ND            |

**Table S3.a** Parameter values for water samples taken after increasing levels of treatment during the field tests of the Mobile DPR Trailer. ND = Not Detected. LoD = Limit of Detection.

| Parameter              | Units | LoD   | DPR Trailer Field Test |           |       |        |
|------------------------|-------|-------|------------------------|-----------|-------|--------|
|                        |       |       | WWE                    | BAC-UF-RO | +AOP  | +NaOCl |
| Aluminum               | mg/L  | 0.05  | ND                     | ND        | ND    | ND     |
| Antimony               | mg/L  | 0.006 | ND                     | ND        | ND    | ND     |
| Arsenic                | mg/L  | 0.002 | ND                     | ND        | ND    | ND     |
| Barium                 | mg/L  | 0.05  | ND                     | ND        | ND    | ND     |
| Beryllium              | mg/L  | 0.002 | ND                     | ND        | ND    | ND     |
| Boron                  | mg/L  | 0.01  | ND                     | ND        | ND    | ND     |
| Cadmium                | mg/L  | 0.001 | 0.002                  | ND        | ND    | ND     |
| Calcium                | mg/L  | 0.1   | 59                     | ND        | ND    | ND     |
| Cesium                 | mg/L  | 0.02  | ND                     | ND        | ND    | ND     |
| Chromium               | mg/L  | 0.01  | ND                     | ND        | ND    | ND     |
| Copper                 | mg/L  | 0.02  | 0.014                  | ND        | ND    | ND     |
| Iron                   | mg/L  | 0.01  | 0.06                   | ND        | ND    | ND     |
| Lead                   | mg/L  | 0.001 | ND                     | ND        | ND    | ND     |
| Magnesium              | mg/L  | 0.1   | 8.59                   | ND        | ND    | ND     |
| Manganese              | mg/L  | 0.005 | 0.075                  | ND        | ND    | ND     |
| Mercury                | ug/L  | 0.025 | ND                     | ND        | ND    | ND     |
| Molybdenum             | mg/L  | 0.02  | ND                     | ND        | ND    | ND     |
| Nickel                 | mg/L  | 0.02  | 0.042                  | ND        | ND    | ND     |
| Potassium              | mg/L  | 0.1   | ND                     | ND        | ND    | ND     |
| Selenium               | mg/L  | 0.005 | ND                     | ND        | ND    | ND     |
| Silver                 | mg/L  | 0.005 | ND                     | ND        | ND    | ND     |
| Sodium                 | mg/L  | 0.1   | 380                    | 20        | 25    | 56     |
| Strontium              | mg/L  | 0.001 | 0.238                  | 0.001     | 0.001 | 0.002  |
| Sulfur                 | mg/L  | 0.2   | ND                     | ND        | ND    | ND     |
| Thallium               | mg/L  | 0.002 | ND                     | ND        | ND    | ND     |
| Uranium                | mg/L  | 0.005 | ND                     | ND        | ND    | ND     |
| Zinc                   | mg/L  | 0.02  | 0.09                   | ND        | ND    | ND     |
| Alkalinity             | mg/L  | 10    | 36                     | ND        | ND    | 64     |
| Bromide                | mg/L  | 0.1   | ND                     | ND        | ND    | ND     |
| Chlorate               | mg/L  | 0.05  | ND                     | ND        | ND    | ND     |
| Chloride               | mg/L  | 0.2   | 340                    | 14        | 6.2   | 6.2    |
| Fluoride               | mg/L  | 0.05  | ND                     | ND        | ND    | ND     |
| Hardness               | mg/L  | 10    | 180                    | ND        | ND    | ND     |
| Nitrate                | mg/L  | 0.1   | 9.1                    | 1.2       | 1.4   | 1.3    |
| Nitrite                | mg/L  | 0.1   | ND                     | ND        | ND    | ND     |
| pH                     | s.u.  | -     | 8.1                    | 8.2       | 3.7   | 7.3    |
| Silica                 | mg/L  | 0.1   | ND                     | ND        | ND    | ND     |
| Sulfate                | mg/L  | 0.5   | 410                    | ND        | 24    | 30     |
| Total Dissolved Solids | mg/L  | 10    | 1250                   | 36        | 68    | 150    |

**Table S3.b** Parameter values for water samples taken after increasing levels of treatment during the field tests of the Mobile DPR Trailer (Continued). ND = Not Detected. LoD = Limit of Detection.

| Parameter                   | Units | LoD  | DPR Trailer Field Test |           |      |        |
|-----------------------------|-------|------|------------------------|-----------|------|--------|
|                             |       |      | WWE                    | BAC-UF-RO | +AOP | +NaOCl |
| Total Organic Carbon        | mg/L  | 0.05 | 2.2                    | 0.22      | 0.27 | 0.22   |
| 1,1,1-Trichloroethane       | µg/L  | 0.5  | ND                     | ND        | ND   | ND     |
| 1,1,1,2-Tetrachloroethane   | µg/L  | 0.5  | ND                     | ND        | ND   | ND     |
| 1,1,2-Trichloroethane       | µg/L  | 0.5  | ND                     | ND        | ND   | ND     |
| 1,1-Dichloroethane          | µg/L  | 0.5  | ND                     | ND        | ND   | ND     |
| 1,1-Dichloroethene          | µg/L  | 0.5  | ND                     | ND        | ND   | ND     |
| 1,2,3-Trichloropropane      | µg/L  | 0.5  | ND                     | ND        | ND   | ND     |
| 1,2,4-Trichlorobenzene      | µg/L  | 0.5  | ND                     | ND        | ND   | ND     |
| 1,2-Dibromo-3-chloropropane | µg/L  | 0.2  | ND                     | ND        | ND   | ND     |
| 1,2-Dichlorobenzene         | µg/L  | 0.5  | ND                     | ND        | ND   | ND     |
| 1,2-Dichloroethane          | µg/L  | 0.5  | ND                     | ND        | ND   | ND     |
| 1,2-Dichloropropane         | µg/L  | 0.5  | ND                     | ND        | ND   | ND     |
| 1,3-Dichlorobenzene         | µg/L  | 0.5  | ND                     | ND        | ND   | ND     |
| 1,3-Dichloropropane         | µg/L  | 0.5  | ND                     | ND        | ND   | ND     |
| 1,4-Dichlorobenzene         | µg/L  | 0.5  | ND                     | ND        | ND   | ND     |
| Acrolein                    | µg/L  | 20   | ND                     | ND        | ND   | ND     |
| Acrylonitrile               | µg/L  | 2    | ND                     | ND        | ND   | ND     |
| Benzene                     | µg/L  | 0.5  | ND                     | 2         | 2    | 2      |
| Bromodichloromethane        | µg/L  | 1    | ND                     | ND        | ND   | ND     |
| Bromoform                   | µg/L  | 1    | ND                     | ND        | ND   | ND     |
| Carbon tetrachloride        | µg/L  | 0.5  | ND                     | ND        | ND   | ND     |
| Chloroform                  | µg/L  | 0.5  | 8                      | ND        | ND   | ND     |
| Chlorobenzene               | µg/L  | 0.5  | ND                     | ND        | ND   | ND     |
| Cis-1,2-Dichloroethene      | µg/L  | 0.5  | ND                     | ND        | ND   | ND     |
| Cis-1,3-Dichloropropene     | µg/L  | 0.5  | ND                     | ND        | ND   | ND     |
| Dibromochloromethane        | µg/L  | 1    | ND                     | ND        | ND   | ND     |
| Ethylbenzene                | µg/L  | 0.5  | ND                     | ND        | ND   | ND     |
| Ethylene dibromide          | µg/L  | 0.2  | ND                     | ND        | ND   | ND     |
| Hexachlorobutadiene         | µg/L  | 0.2  | ND                     | ND        | ND   | ND     |
| M-and/or p-xylene           | µg/L  | 1    | ND                     | ND        | ND   | ND     |
| Methyl t-butyl ether (MTBE) | µg/L  | 5    | ND                     | ND        | ND   | ND     |
| Methylene chloride          | µg/L  | 0.5  | ND                     | ND        | ND   | ND     |
| O-Xylene                    | µg/L  | 5    | ND                     | ND        | ND   | ND     |
| Styrene                     | µg/L  | 0.5  | ND                     | ND        | ND   | ND     |
| Tetrachloroethene           | µg/L  | 0.5  | ND                     | ND        | ND   | ND     |
| Toluene                     | µg/L  | 0.5  | 1                      | 27        | 46   | 46     |
| Trans-1,2-Dichloroethene    | µg/L  | 0.5  | ND                     | ND        | ND   | ND     |
| Trans-1,3-Dichloropropene   | µg/L  | 0.5  | ND                     | ND        | ND   | ND     |

**Table S3.c** Parameter values for water samples taken after increasing levels of treatment during the field tests of the Mobile DPR Trailer (Continued). ND = Not Detected. LoD = Limit of Detection.

| Parameter                     | Units | LoD | DPR Trailer Field Test |           |      |        |
|-------------------------------|-------|-----|------------------------|-----------|------|--------|
|                               |       |     | WWE                    | BAC-UF-RO | +AOP | +NaOCl |
| Trichloroethene               | µg/L  | 0.5 | ND                     | ND        | ND   | ND     |
| Trichlorofluoromethane        | µg/L  | 0.5 | ND                     | ND        | ND   | ND     |
| Trihalomethanes, total (TTHM) | µg/L  | 1   | 8                      | ND        | ND   | ND     |
| Haloacetic Acids (HAA5)       | µg/L  | 1   | ND                     | ND        | ND   | 5      |
| Vinyl chloride                | µg/L  | 0.5 | ND                     | ND        | ND   | ND     |
| 2,4-Dinitrotoluene            | µg/L  | 0.5 | ND                     | ND        | ND   | ND     |
| Benzo(a)pyrene                | µg/L  | 0.2 | ND                     | ND        | ND   | ND     |
| Bis(2-ethylhexyl)adipate      | µg/L  | 2   | ND                     | ND        | ND   | ND     |
| Bis(2-ethylhexyl)phthalate    | µg/L  | 2   | ND                     | ND        | ND   | ND     |
| Hexachlorobenzene             | µg/L  | 0.2 | ND                     | ND        | ND   | ND     |
| Hexachlorocyclopentadiene     | µg/L  | 0.2 | ND                     | ND        | ND   | ND     |
| NDMA                          | µg/L  | 5   | ND                     | ND        | ND   | ND     |
| Pentachlorophenol             | µg/L  | 0.5 | ND                     | ND        | ND   | ND     |
| 4,4'-DDT                      | µg/L  | 0.5 | ND                     | ND        | ND   | ND     |
| Alachlor                      | µg/L  | 0.2 | ND                     | ND        | ND   | ND     |
| Atrazine                      | µg/L  | 0.2 | ND                     | ND        | ND   | ND     |
| Chlordane, alpha              | µg/L  | 0.2 | ND                     | ND        | ND   | ND     |
| Chlordane, gamma              | µg/L  | 0.2 | ND                     | ND        | ND   | ND     |
| Endrin                        | µg/L  | 0.2 | ND                     | ND        | ND   | ND     |
| Heptachlor                    | µg/L  | 0.2 | ND                     | ND        | ND   | ND     |
| Heptachlor epoxide            | µg/L  | 0.2 | ND                     | ND        | ND   | ND     |
| Lindane                       | µg/L  | 0.2 | ND                     | ND        | ND   | ND     |
| Methoxychlor                  | µg/L  | 0.2 | ND                     | ND        | ND   | ND     |
| Metolachlor                   | µg/L  | 0.5 | ND                     | ND        | ND   | ND     |
| Metribuzin                    | µg/L  | 0.5 | ND                     | ND        | ND   | ND     |
| Simazine                      | µg/L  | 1   | ND                     | ND        | ND   | ND     |
| Toxaphene                     | µg/L  | 3   | ND                     | ND        | ND   | ND     |
| Trifluralin                   | µg/L  | 0.2 | ND                     | ND        | ND   | ND     |
| PCB Aroclor, Total            | µg/L  | 0.5 | ND                     | ND        | ND   | ND     |
| 1,7-Dimethylxanthine          | ng/L  | 10  | 17                     | ND        | ND   | ND     |
| Acetaminophen                 | ng/L  | 5   | 320                    | ND        | ND   | ND     |
| Albuterol                     | ng/L  | 5   | 12                     | ND        | ND   | ND     |
| Amoxicillin                   | ng/L  | 20  | ND                     | ND        | ND   | ND     |
| Androstenedione               | ng/L  | 5   | ND                     | ND        | ND   | ND     |
| Atenolol                      | ng/L  | 5   | 300                    | ND        | ND   | ND     |
| Atrazine                      | ng/L  | 5   | ND                     | ND        | ND   | ND     |
| Bezafibrate                   | ng/L  | 5   | ND                     | ND        | ND   | ND     |
| Bromacil                      | ng/L  | 5   | ND                     | ND        | ND   | ND     |

**Table S3.d** Parameter values for water samples taken after increasing levels of treatment during the field tests of the Mobile DPR Trailer (Continued). ND = Not Detected. LoD = Limit of Detection.

| Parameter         | Units | LoD | DPR Trailer Field Test |           |      |        |
|-------------------|-------|-----|------------------------|-----------|------|--------|
|                   |       |     | WWE                    | BAC-UF-RO | +AOP | +NaOCl |
| Caffeine          | ng/L  | 5   | 230                    | ND        | ND   | ND     |
| Carbadox          | ng/L  | 5   | ND                     | ND        | ND   | ND     |
| Carbamazepine     | ng/L  | 5   | 630                    | ND        | ND   | ND     |
| Carisoprodol      | ng/L  | 5   | 5.8                    | ND        | ND   | ND     |
| Chloridazon       | ng/L  | 5   | ND                     | ND        | ND   | ND     |
| Chlorotoluron     | ng/L  | 50  | ND                     | ND        | ND   | ND     |
| Cimetidine        | ng/L  | 5   | 190                    | ND        | ND   | ND     |
| Cotinine          | ng/L  | 10  | 62                     | ND        | ND   | ND     |
| Cyanazine         | ng/L  | 5   | ND                     | ND        | ND   | ND     |
| DACT              | ng/L  | 5   | ND                     | ND        | ND   | ND     |
| DEA               | ng/L  | 5   | ND                     | ND        | ND   | ND     |
| DEET              | ng/L  | 10  | 33                     | ND        | ND   | ND     |
| Dehydronifedipine | ng/L  | 5   | ND                     | ND        | ND   | ND     |
| DIA               | ng/L  | 5   | ND                     | ND        | ND   | ND     |
| Diazepam          | ng/L  | 5   | ND                     | ND        | ND   | ND     |
| Dilantin          | ng/L  | 20  | 38                     | ND        | ND   | ND     |
| Diltiazem         | ng/L  | 5   | 130                    | ND        | ND   | ND     |
| Diuron            | ng/L  | 5   | 99                     | ND        | ND   | ND     |
| Erythromycin      | ng/L  | 10  | ND                     | ND        | ND   | ND     |
| Flumequine        | ng/L  | 10  | ND                     | ND        | ND   | ND     |
| Fluoxetine        | ng/L  | 10  | 65                     | ND        | ND   | ND     |
| Isoproturon       | ng/L  | 100 | ND                     | ND        | ND   | ND     |
| Ketoprofen        | ng/L  | 5   | ND                     | ND        | ND   | ND     |
| Ketorolac         | ng/L  | 5   | ND                     | ND        | ND   | ND     |
| Lidocaine         | ng/L  | 5   | 210                    | ND        | ND   | ND     |
| Lincomycin        | ng/L  | 10  | ND                     | ND        | ND   | ND     |
| Linuron           | ng/L  | 5   | ND                     | ND        | ND   | ND     |
| Lopressor         | ng/L  | 20  | ND                     | ND        | ND   | ND     |
| Meclofenamic acid | ng/L  | 5   | ND                     | ND        | ND   | ND     |
| Meprobamate       | ng/L  | 5   | 35                     | ND        | ND   | ND     |
| Metazachlor       | ng/L  | 5   | ND                     | ND        | ND   | ND     |
| Metformin         | ng/L  | 5   | ND                     | ND        | ND   | ND     |
| Metolachlor       | ng/L  | 5   | ND                     | ND        | ND   | ND     |
| Nifedipine        | ng/L  | 20  | ND                     | ND        | ND   | ND     |
| Norethisterone    | ng/L  | 5   | ND                     | ND        | ND   | ND     |
| OUST              | ng/L  | 5   | ND                     | ND        | ND   | ND     |
| Oxolinic acid     | ng/L  | 10  | ND                     | ND        | ND   | ND     |
| Pentoxifylline    | ng/L  | 5   | ND                     | ND        | ND   | ND     |
| Phenazone         | ng/L  | 5   | ND                     | ND        | ND   | ND     |



**Table S3.e** Parameter values for water samples taken after increasing levels of treatment during the field tests of the Mobile DPR Trailer (Continued). ND = Not Detected. LoD = Limit of Detection.

| Parameter                  | Units | LoD | DPR Trailer Field Test |           |      |        |
|----------------------------|-------|-----|------------------------|-----------|------|--------|
|                            |       |     | WWE                    | BAC-UF-RO | +AOP | +NaOCl |
| Primidone                  | ng/L  | 5   | ND                     | ND        | ND   | ND     |
| Progesterone               | ng/L  | 5   | ND                     | ND        | ND   | ND     |
| Propazine                  | ng/L  | 5   | 160                    | 8         | ND   | ND     |
| Quinoline                  | ng/L  | 5   | ND                     | ND        | ND   | ND     |
| Simazine                   | ng/L  | 5   | ND                     | ND        | ND   | ND     |
| Sulfachloropyridazine      | ng/L  | 5   | ND                     | ND        | ND   | ND     |
| Sulfadiazine               | ng/L  | 5   | ND                     | ND        | ND   | ND     |
| Sulfadimethoxine           | ng/L  | 5   | 430                    | ND        | ND   | ND     |
| Sulfamerazine              | ng/L  | 5   | 190                    | ND        | ND   | ND     |
| Sulfamethazine             | ng/L  | 5   | ND                     | ND        | ND   | ND     |
| Sulfamethizole             | ng/L  | 5   | ND                     | ND        | ND   | ND     |
| Sulfamethoxazole           | ng/L  | 5   | ND                     | ND        | ND   | ND     |
| Sulfathiazole              | ng/L  | 5   | ND                     | ND        | ND   | ND     |
| TCEP                       | ng/L  | 10  | ND                     | ND        | ND   | ND     |
| T CPP                      | ng/L  | 100 | 6200                   | 46        | ND   | ND     |
| TDCPP                      | ng/L  | 100 | 2200                   | 14        | ND   | ND     |
| Testosterone               | ng/L  | 5   | ND                     | ND        | ND   | ND     |
| Theobromine                | ng/L  | 10  | 310                    | ND        | ND   | ND     |
| Theophylline               | ng/L  | 20  | 140                    | ND        | ND   | ND     |
| Thiabendazole              | ng/L  | 5   | ND                     | ND        | ND   | ND     |
| Trimethoprim               | ng/L  | 5   | 300                    | ND        | ND   | ND     |
| 2,4-D                      | ng/L  | 5   | ND                     | ND        | ND   | ND     |
| 4-nonylphenol              | ng/L  | 100 | ND                     | ND        | ND   | ND     |
| 4-tert-Octylphenol         | ng/L  | 50  | ND                     | ND        | ND   | ND     |
| Acesulfame-K               | ng/L  | 20  | 1000                   | 22        | ND   | ND     |
| Bendroflumethiazide        | ng/L  | 5   | ND                     | ND        | ND   | ND     |
| BPA                        | ng/L  | 10  | 99                     | ND        | ND   | ND     |
| Butalbital                 | ng/L  | 5   | 37                     | ND        | ND   | ND     |
| Butylparaben               | ng/L  | 5   | ND                     | ND        | ND   | ND     |
| Chloramphenicol            | ng/L  | 10  | ND                     | ND        | ND   | ND     |
| Clofibric Acid             | ng/L  | 5   | ND                     | ND        | ND   | ND     |
| Diclofenac                 | ng/L  | 5   | ND                     | ND        | ND   | ND     |
| Estradiol                  | ng/L  | 5   | ND                     | ND        | ND   | ND     |
| Estriol                    | ng/L  | 5   | ND                     | ND        | ND   | ND     |
| Estrone                    | ng/L  | 5   | ND                     | ND        | ND   | ND     |
| Ethinyl Estradiol 17 alpha | ng/L  | 5   | ND                     | ND        | ND   | ND     |
| Ethylparaben               | ng/L  | 20  | ND                     | ND        | ND   | ND     |
| Gemfibrozil                | ng/L  | 5   | ND                     | ND        | ND   | ND     |
| Ibuprofen                  | ng/L  | 10  | 12                     | ND        | ND   | ND     |

**Table S3.f** Parameter values for water samples taken after increasing levels of treatment during the field tests of the Mobile DPR Trailer (Continued). ND = Not Detected. LoD = Limit of Detection.

| Parameter       | Units | LoD | DPR Trailer Field Test |           |      |        |
|-----------------|-------|-----|------------------------|-----------|------|--------|
|                 |       |     | WWE                    | BAC-UF-RO | +AOP | +NaOCl |
| Iohexal         | ng/L  | 10  | ND                     | ND        | ND   | ND     |
| Iopromide       | ng/L  | 5   | ND                     | ND        | ND   | ND     |
| Isobutylparaben | ng/L  | 5   | ND                     | ND        | ND   | ND     |
| Methylparaben   | ng/L  | 20  | ND                     | ND        | ND   | ND     |
| Naproxen        | ng/L  | 10  | 160                    | ND        | ND   | ND     |
| Propylparaben   | ng/L  | 5   | ND                     | ND        | ND   | ND     |
| Salicylic Acid  | ng/L  | 100 | 470                    | 58        | ND   | ND     |
| Sucralose       | ng/L  | 100 | 81000                  | ND        | ND   | ND     |
| Triclocarban    | ng/L  | 5   | ND                     | ND        | ND   | ND     |
| Triclosan       | ng/L  | 10  | ND                     | ND        | ND   | ND     |
| Warfarin        | ng/L  | 5   | 19                     | ND        | ND   | ND     |
| PFOA            | ng/L  | 2   | ND                     | ND        | ND   | ND     |
| PFOS            | ng/L  | 2   | ND                     | ND        | ND   | ND     |

**Table S.4** Ingredients for the synthetic wastewater effluent (SWWE) formulation that was used in controlled testing of the DPR trailer system at a pilot laboratory prior to field testing.

| <b>Component</b>                     | <b>Amount (g/1900 L)</b> |
|--------------------------------------|--------------------------|
| Beef Extract Powder                  | 7.2                      |
| Milk Powder                          | 7.2                      |
| Urea                                 | 3.6                      |
| Ammonium Chloride                    | 3                        |
| Humic Acid                           | 1.2                      |
| Yeast Extract Powder                 | 9.6                      |
| Potassium Phosphate (di-basic)       | 8.4                      |
| Sodium Chloride                      | 7                        |
| Standard Test Dust (SO 12103-1, A-2) | 0.2                      |
| Commercial Top Soil                  | 0.12                     |
| Acetaminophen                        | 0.0017                   |
| Aspirin                              | 0.0025                   |
| Salicylamide                         | 0.0024                   |
| Caffeine                             | 0.0005                   |
| Bacteracin                           | 0.0001                   |
| Lidocaine                            | 0.0002                   |
| BPA                                  | 0.0003                   |
| Acesulfame K                         | 0.0005                   |
| Sucralose                            | 0.0006                   |
| DEET                                 | 0.007                    |
| Sodium Hypochlorite (7%)             | 0.011                    |
| Sodium Dodecyl Sulfate               | 0.005                    |
| Primary Wastewater (Ultrafiltered)   | 500 (0.5 L)              |
